# Supplementary material for: AgRP Neuron-Specific Ablation Represses Appetite, Energy Intake, and Somatic Growth in Larval Zebrafish
Source: MDPI journal article supplement (doi:10.3390/biomedicines11020499), 2023-02-09
Supplement: s1 [file s1]

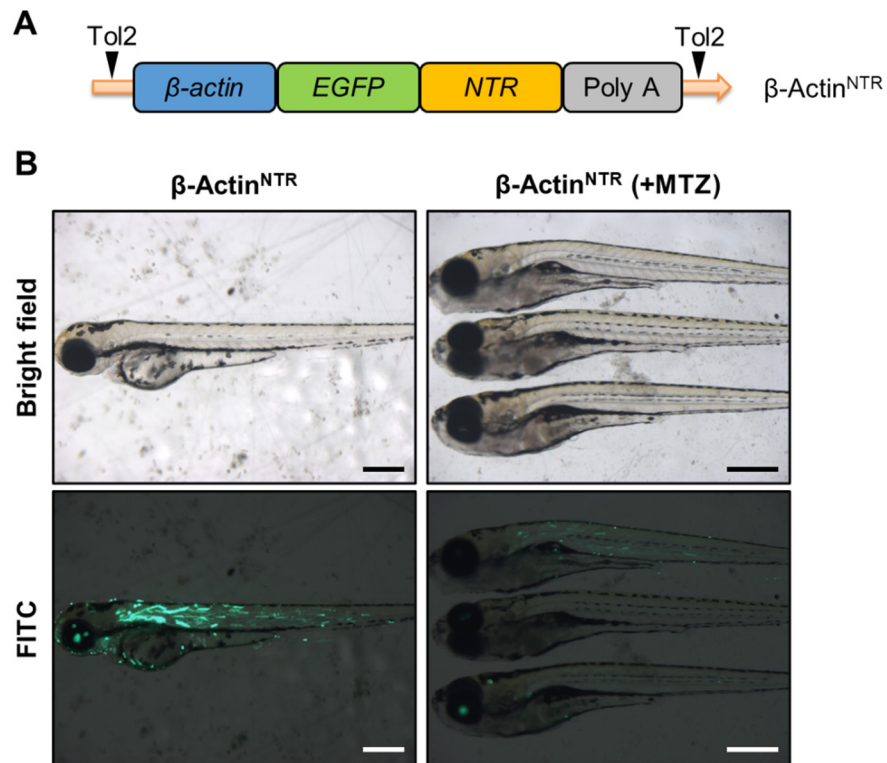

**Figure S1.** Functional test of EGFP-NTR fusion protein. **(A)** Schematic diagram of the DNA construct used to generate  $\beta$ -Actin<sup>NTR</sup> (Tg[ $\beta$ -actin-EGFP-NTR]) transgenic zebrafish.  $\beta$ -actin-EGFP-NTR contains a ubiquitous  $\beta$ -actin promoter, and EGFP-NTR fusion has an in-frame 24 bp region downstream of the  $\beta$ -Actin translational start site. **(B)** Fluorescence images of (1)  $\beta$ -Actin<sup>NTR</sup> transgenic zebrafish larvae at 3 days post-fertilization (dpf) and (2) metronidazole (MTZ)-treated  $\beta$ -Actin<sup>NTR</sup> transgenic zebrafish larvae at 8 dpf (5 d post-treatment [dpt]). Scale bar: 500  $\mu$ m.
