# Supplementary material for: AgRP Neuron-Specific Ablation Represses Appetite, Energy Intake, and Somatic Growth in Larval Zebrafish
Source: MDPI journal article supplement (doi:10.3390/biomedicines11020499), 2023-02-09
Supplement: s1 [file s1]

**Table S1. Primer sequences used for real-time quantitative polymerase chain reaction (qPCR)**

| Gene           | Accession      | Forward Primer          | Reverse Primer         |
|----------------|----------------|-------------------------|------------------------|
| <i>bactin1</i> | NM_131031.1    | CGAGCAGGAGATGGGAACC     | CAACGGAAACGCTCATTGC    |
| <i>agrp</i>    | NM_001328012.1 | ACACAGTAATCTTCGGCTGG    | TCCATTTCAGGCAGTGAGTC   |
| <i>agrp2</i>   | NM_001271291.1 | AGTTCAGTCCATCACATGCG    | TTTCTCCTGATTCCACACTCC  |
| <i>npv</i>     | NM_131074.2    | AGCACTAAGACACTACATCAACC | GATGAGATCACCATGCCAAATG |
| <i>pdyn</i>    | NM_001001831.1 | TGGAGTGGTATGTGTTGGTG    | CGGCTCCTTCACACTCTAAAG  |
| <i>pmch</i>    | NM_001202542.1 | TTCATACTTGGGACACAGG     | TCCATCGTGCTGAATCCATC   |
| <i>hcrt</i>    | NM_001077392   | TCATGGACTGCACAGCTAAG    | CATCTCGTAGAGTTTGCAGGAG |
| <i>gal</i>     | NM_001346239.1 | CATTGATAGTCACAGGAGCCTC  | CGACATCCTCATCTGCTATCC  |
| <i>nts</i>     | XM_021473261.1 | GCAATAGAGGATGAGGTTCTGAG | CTTCCAGCCACGAGTCAC     |
| <i>bdnf</i>    | NM_001308648.1 | AGCATCTGTTGGAGTGTGTG    | CAGCTCTCATGCAACTGAAG   |
| <i>sim1a</i>   | NM_178222.3    | CTGTACATTTTCAGAAACGGCG  | AAGTGTGAATGATAGGGCTGG  |
| <i>trh</i>     | NM_001012365.2 | GCGCTCCATCCTCACAC       | GCTGTCGCTTCTCCATCC     |
| <i>tg</i>      | NM_001329865.1 | ACACCTTCAGGATACAACGTG   | GCAGCGTTTTCAGGTAAGTG   |
| <i>avp</i>     | NM_178293.2    | CTACATCCAGAACTGCCCAC    | GGCCACACGACATACACTG    |
| <i>nucb1</i>   | NM_001045463.1 | AAGACCTGGAAGTCTTATCG    | GGTCCAAACTCTTCAGGTACTC |
| <i>crhb</i>    | NM_001007379.1 | CCAAGGATTTACCAATTACGCAC | CGATGGCTCTACATTCATACGG |
| <i>oxt</i>     | NM_178291.2    | CCCATTCGACAGTGTATGCC    | ACACGGAGAAGGGAGAAAATC  |
| <i>gh1</i>     | NM_001020492   | AGAAGGACATGCACAAGGTG    | GCAGAAAAGGATAAAGCAGGC  |
| <i>ghra</i>    | NM_001083578.1 | GGCCGAAAATTCTTACTGTT    | GCTGGCGTTGCTGATTGT     |
| <i>ghrb</i>    | NM_001111081.1 | GCTGCGCTCTGTTGATAATGT   | GGCGGAGGGAGGTGGAT      |
| <i>igf1</i>    | NM_131825.2    | GCATAGCCACTCTTCTGTAAG   | TCCAACGGTTTCTCTTGCTCTC |
| <i>igf2b</i>   | NM_001001815   | AACCTGCCAAGTCAGAGAGGG   | GGACCTCCTGTTTTAATGCGG  |
| <i>igfbp1b</i> | NM_001098257.2 | GTCACAACCAACGCCATCC     | GAAGTCTCTCCCAACGCCT    |
| <i>igfbp5b</i> | NM_001126463.1 | CAGGGGAGTGTGTACGAACG    | AGTCGTGTCTGGCTTCACTG   |
| <i>igfbp6a</i> | NM_001161401.1 | TTCAGGAGGAAGCAGTGTCTG   | CATCGCTTCTCTACGGGAC    |
| <i>igfbp6b</i> | NM_001161402.2 | CATCGCTTCTCTACGGGAC     | GGGGTCTCGAACTCACCATT   |
