# Supplementary material for: AgRP Neuron-Specific Ablation Represses Appetite, Energy Intake, and Somatic Growth in Larval Zebrafish
Source: MDPI journal article supplement (doi:10.3390/biomedicines11020499), 2023-02-09
Supplement: s1 [file s1]

**Table S2. Primer sequences used for in situ hybridization probes**

| Gene         | Accession      | Forward Primer           | Reverse Primer           |
|--------------|----------------|--------------------------|--------------------------|
| <i>agrp</i>  | NM_001328012.1 | CTGGGACGTGAGCACTACAGTCTG | CAGCCAATGGTGCACTCTATGCTT |
| <i>pomca</i> | NM_181438      | ACAGAGGAGAAACATCTTGAATGC | GCCCACCTTCGTTTCTATGCATGA |
| <i>npy</i>   | NM_131074.2    | TATCCAACAAAACCCGACAAC    | AATGGACACAACACGCATACA    |
| <i>bdnf</i>  | NM_001308648.1 | GTCATTGAGGAGTTGCTTGAG    | TATCTGCCCCCTCTTAATGGTC   |
| <i>tg</i>    | NM_001329865.1 | GGATGGGTTTCAGAAGAACATT   | GAGGTCTCTGGTAGCGTTTTTC   |
| <i>trh</i>   | NM_001012365.2 | ACACAGATGGAGGAGCAGAAC    | CTTACCCCAGTGACAGCAGA     |
| <i>ghl</i>   | NM_001020492   | ATCCGTGTGCAACACCTTCACCAG | CCATGCCTGCTTGATATTCCTGC  |
